# Supplementary material for: Order–order transitions in poly( N -octadecyl acrylamide- co -hydroxyethyl acrylamide) statistical copolymer films
Source: Royal Society of Chemistry journal article supplement (doi:10.1039/d3sm00265a), 2023-01-01
Supplement: d3sm00265a1.pdf [file d3sm00265a1.pdf]

Supporting information

# Order–order transitions in poly(*N*-octadecyl acrylamide-co-hydroxyethyl acrylamide) statistical copolymer films

*Mao Kikuchi<sup>†</sup>, Nozomi Saito<sup>‡</sup>, Mizuki, Ohke<sup>†</sup>, Shusaku Nagano<sup>§</sup>, Shotaro Nishitsuji<sup>⊥</sup>, and Jun Matsui<sup>‡</sup>*

<sup>†</sup>Graduate School of Science and Engineering, <sup>‡</sup>Faculty of Science, Yamagata University, 1-4-12 Kojirakawa-machi, Yamagata 990-8560, Japan

<sup>§</sup> College of Science, Rikkyo University, 3-34-1 Nishi-Ikebukuro, Toshima-ku, Tokyo 171-8501, Japan

<sup>⊥</sup>Graduate School of Organic Materials Science, Yamagata University, 4-3-16, Jonan, Yonezawa, 992-8510, Japan

## Contents

|                                                                                  |         |
|----------------------------------------------------------------------------------|---------|
| 1. Experimental section                                                          | P2-P3   |
| 2. NMR spectra                                                                   | P3-P10  |
| 3. Schematic for out-of-plane and in-plane XRD as well as 2D GI-XRD measurements | P11     |
| 4. Time-conversion curves for the copolymerization                               | P12     |
| 5. Fineman-Ross plot                                                             | P13     |
| 6. DSC spectra                                                                   | P14     |
| 7. XRD patterns (1D and 2D)                                                      | P15-P18 |
| 8. Fitting results for the in-plane XRD patterns and FT-IR spectra               | P19-P20 |
| 9. HEAm molecular model                                                          | P21     |
| 10. Powder XRD pattern for p(ODA50/HEAm50)                                       | P22     |
| 11. Reference                                                                    | P22     |

## Experimental section

### Time-conversion study.

Different feed ratios of HEAm, ODA, and 1 mol% of AIBN relative to the total monomer amount were added to a pressure-resistant glass tube (ACE GLASS). To this glass tube, toluene and DMF at a volume ratio of 4:1 was added in a glove box filled with N<sub>2</sub> and sealed with a rubber septum. The total concentration was kept constant at 0.2 M. The polymerization was carried out at 60 °C. A small amount of solution was taken by a syringe under Ar flow in predetermined intervals, and the solution was cooled to -50 °C to terminate the progress of copolymerization. The actual monomer feed ratio was determined by <sup>1</sup>H NMR before the reaction. The conversion of the vinyl group was determined by <sup>1</sup>H NMR in CDCl<sub>3</sub> using the methylene group of ODA as an internal standard. The time-conversion study for the molecular feed ratio of ODA : HEAm = 9:1 could not be analyzed due to the overlap of <sup>1</sup>H peaks of vinyl groups in this feed ratio.

### Evaluation of monomer reactivity ratios by Fineman-Ross plot

Monomer reactivity ratios,  $r_1$  and  $r_2$  ( $M_1$  : HEAm and  $M_2$  : ODA), were determined using a Fineman–Ross method<sup>1</sup>, which used the following equation

$$F(f-1)/f = r_1 (F^2/f) - r_2$$

$F = [M_1]_0/[M_2]_0$  where  $[M_1]_0$  and  $[M_2]_0$  are initial HEAm and ODA concentrations and  $f = P[M_1]/P[M_2]$ , where  $P[M_1]$  and  $P[M_2]$  are the compositions of HEAm and ODA in the copolymer. Similar to the time-conversion study, HEAm, ODA and AIBN (1 mol% relative to the total monomer amount) were added to a pressure-resistant glass tube (ACE GLASS). To this glass tube, toluene and DMF at a volume ratio of 4:1 was added in a glove box filled with N<sub>2</sub> to give a total solute concentration of 0.2 M. The actual feed monomer ratios were  $[M_1]_0 : [M_2]_0 = 3:7, 4:6, 5:5, 6:4, \text{ and } 8:2$ , which were determined by <sup>1</sup>H NMR of the solution before the polymerization. The polymerization was carried out at 60 °C and terminated at a total conversion of less than 6% except for the copolymerization with the monomer feed ratio of HEAm: ODA = 3: 7, which was 13%. The copolymer composition was calculated using the monomer conversion determined by <sup>1</sup>H NMR using methylene groups of ODA as an internal standard.  $F(f-1)/f$  was plotted against  $F^2/f$ . Then the data points are fitted to a straight line. The slope of the straight line gives  $r_1$  and the intercept gives  $r_2$ .

### HEAm length calculation

The side chain length of HEAm was calculated by a molecular model created using Winmostar V11, which uses MOPAC to perform structure energy minimization.

### Powder XRD measurement.

p(ODA50/HEAm50) powder was placed in a glass sample tube. The glass tube was put into an oven at 115 °C for 24 h. Then the copolymer powder was placed in a glass sample holder to measure XRD. The measurement condition is the same for out-of-plane XRD measurement.

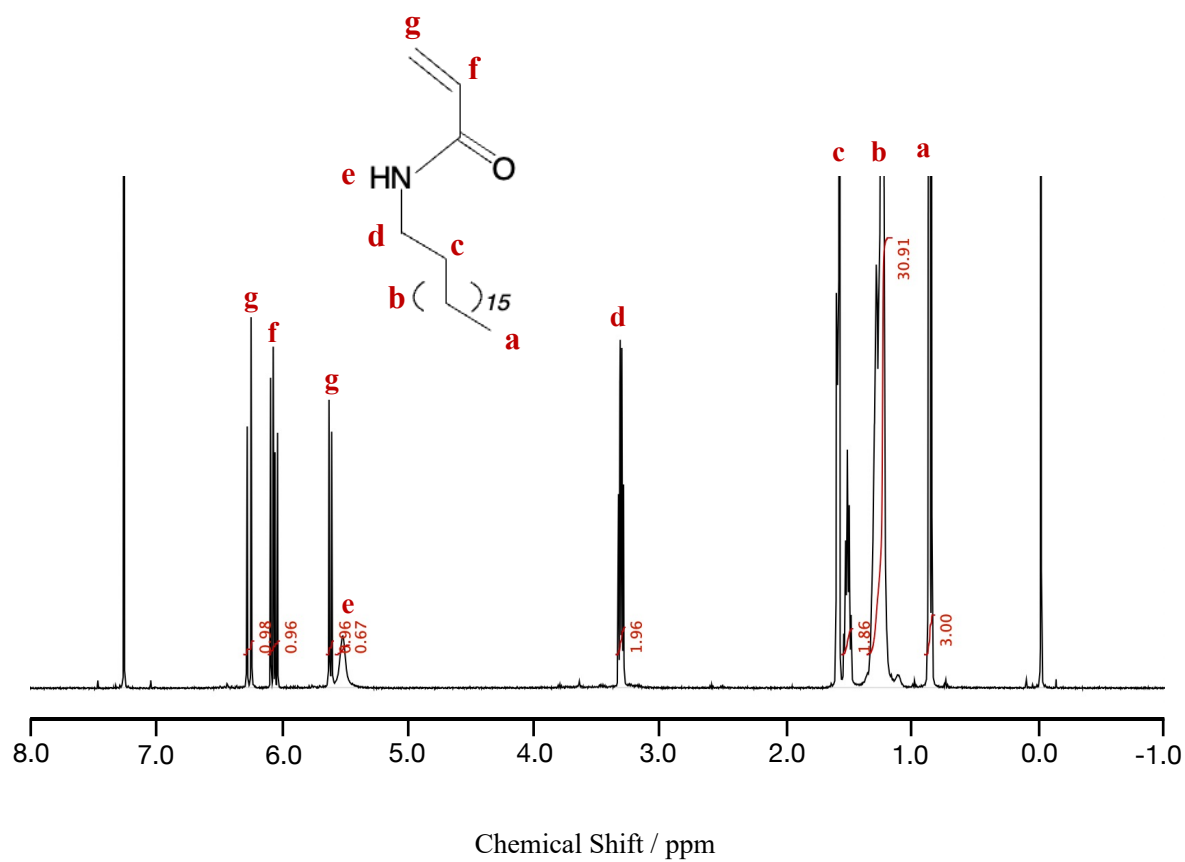

**Figure S1**  $^1\text{H}$ -NMR spectrum of ODA

(a)

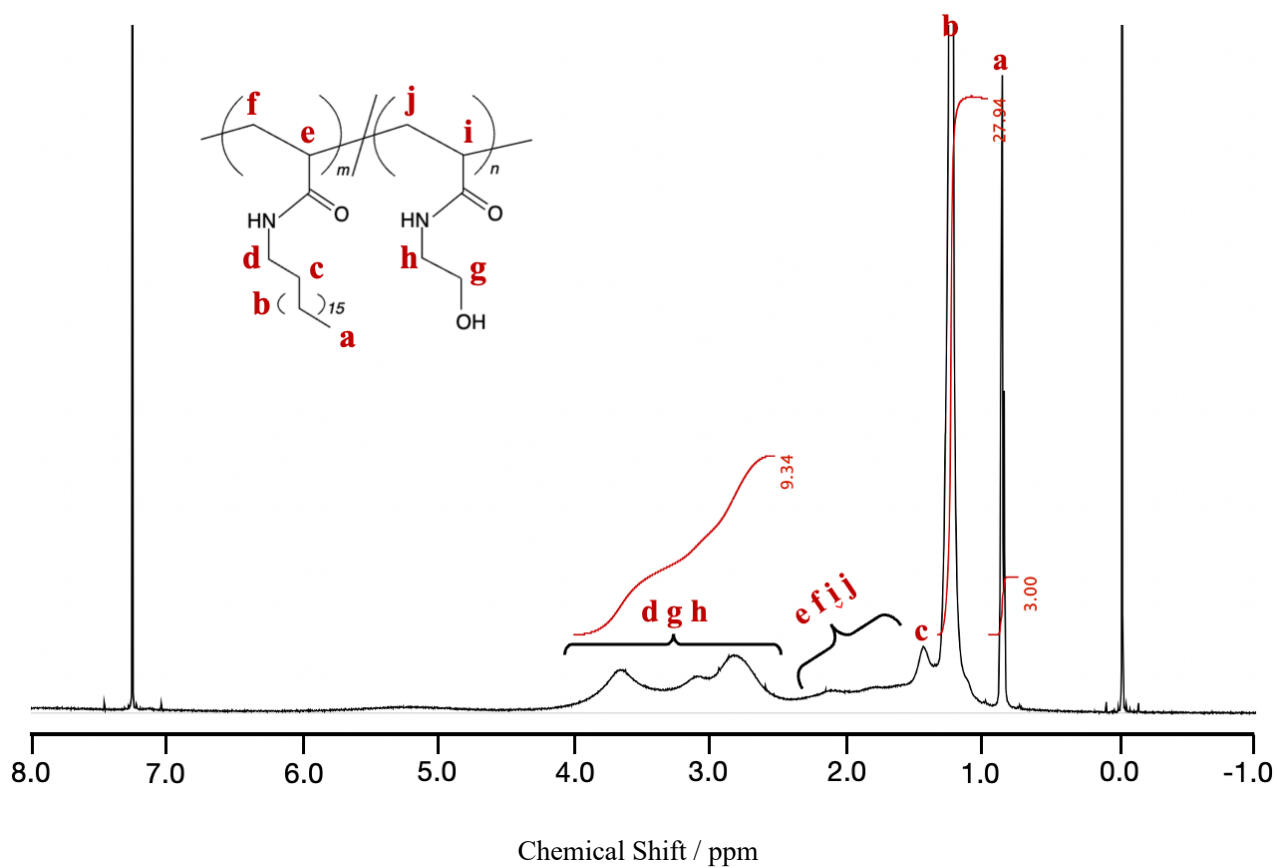

(b)

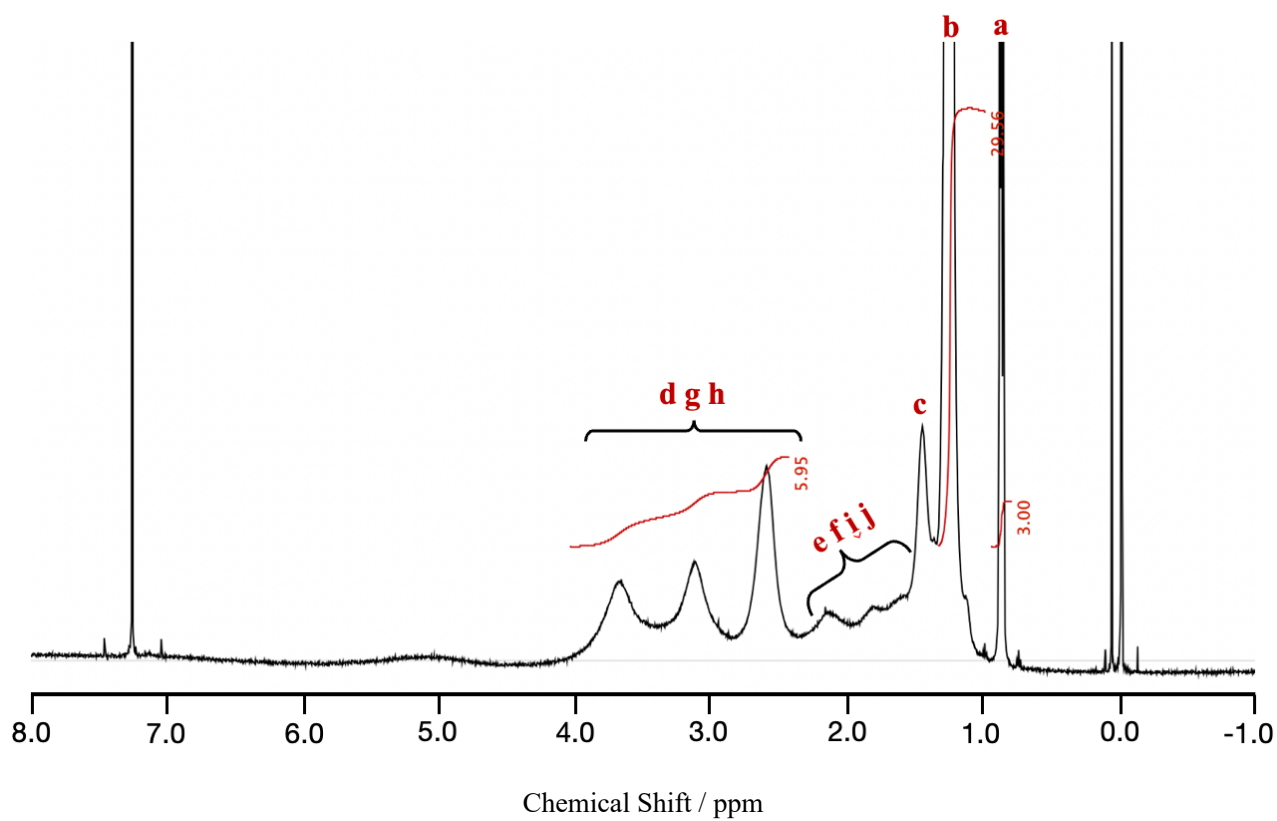

(c)

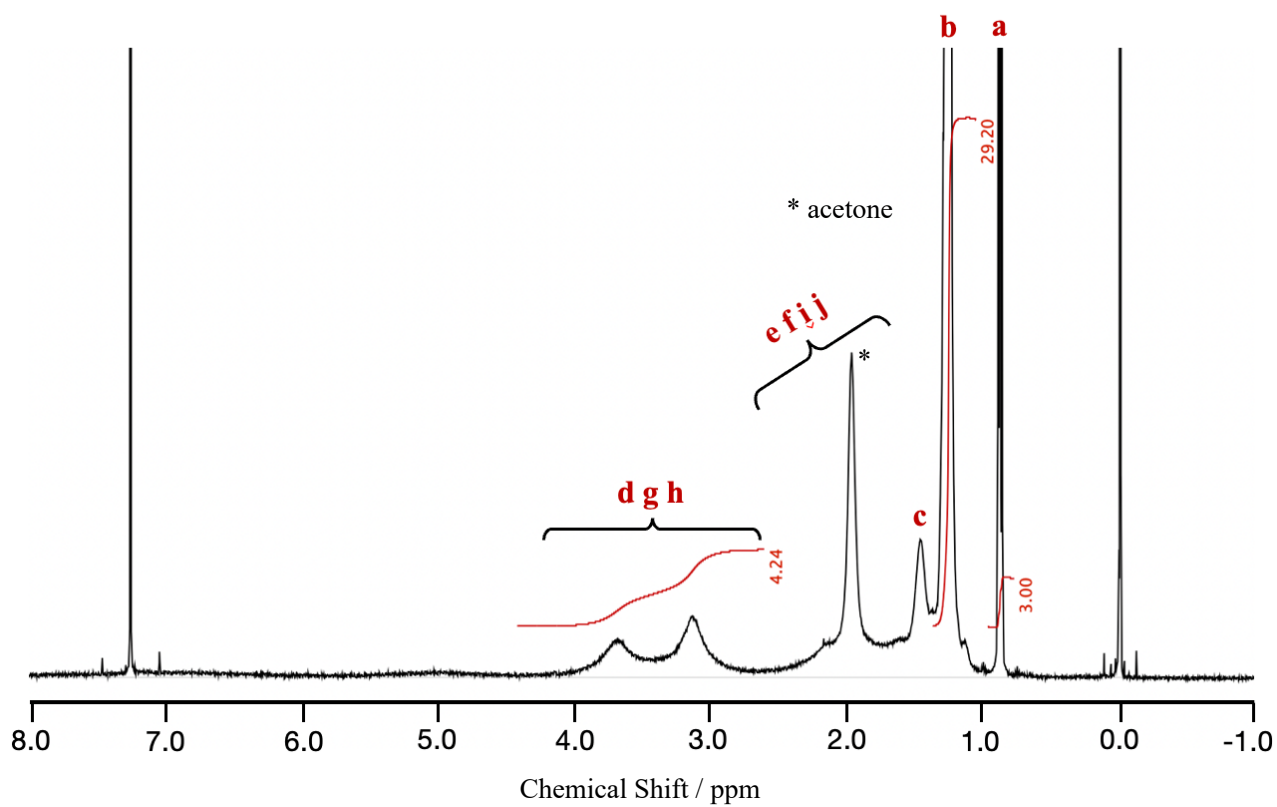

(d)

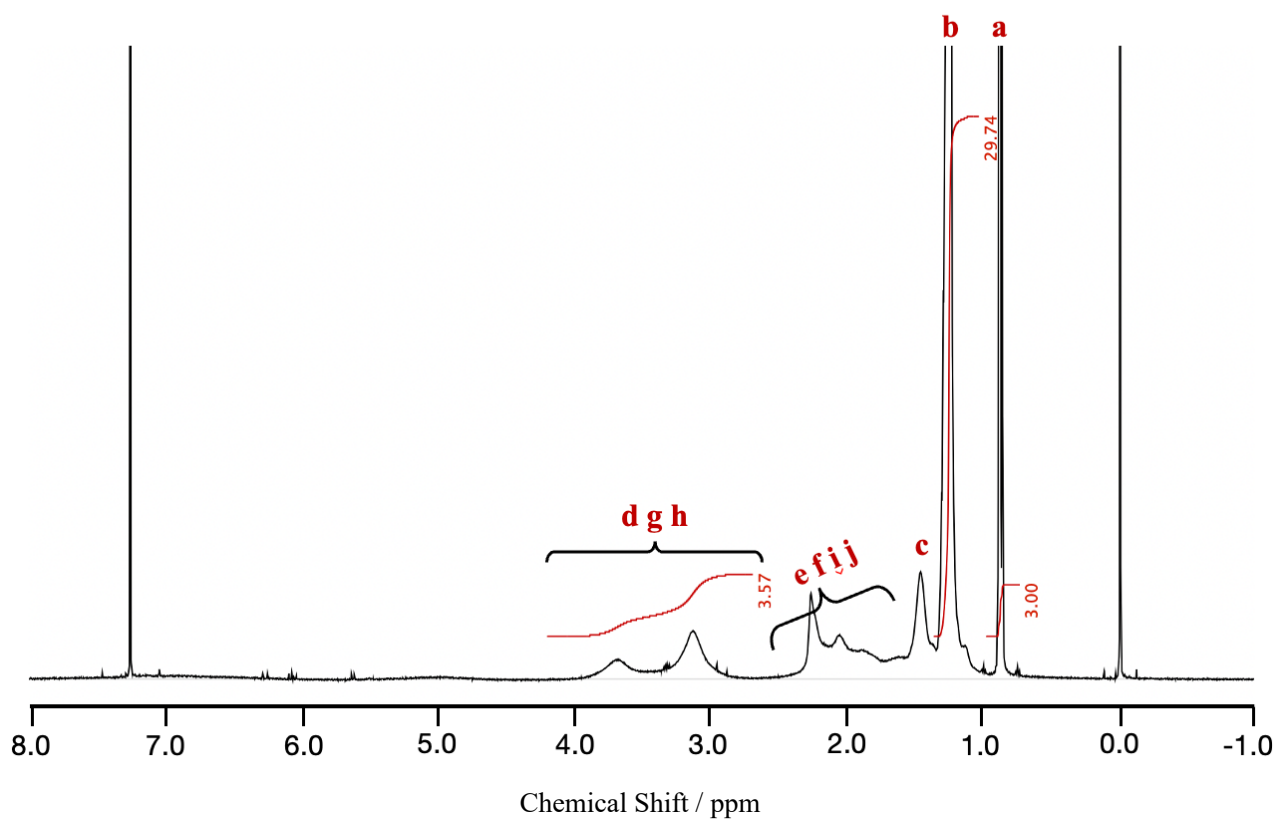

(e)

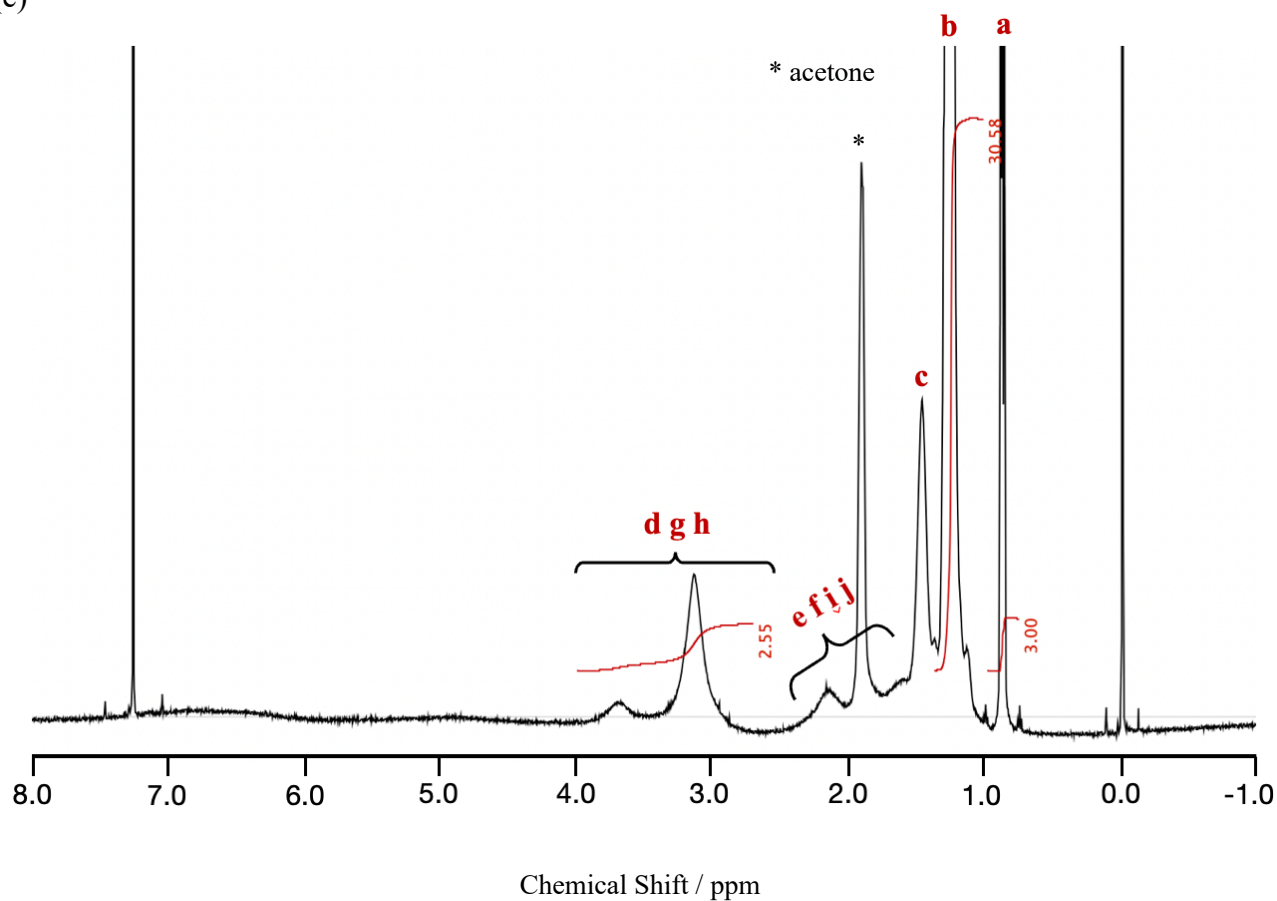

**Figure S2**  $^1\text{H}$  spectrum for p(ODA/HEAm). (a) p(ODA40/HEAm60), (b) p(ODA50/HEAm50), (c) p(ODA60/HEAm40), (d) p(ODA70/HEAm30), (e) p(ODA90/HEAm10).

(a)

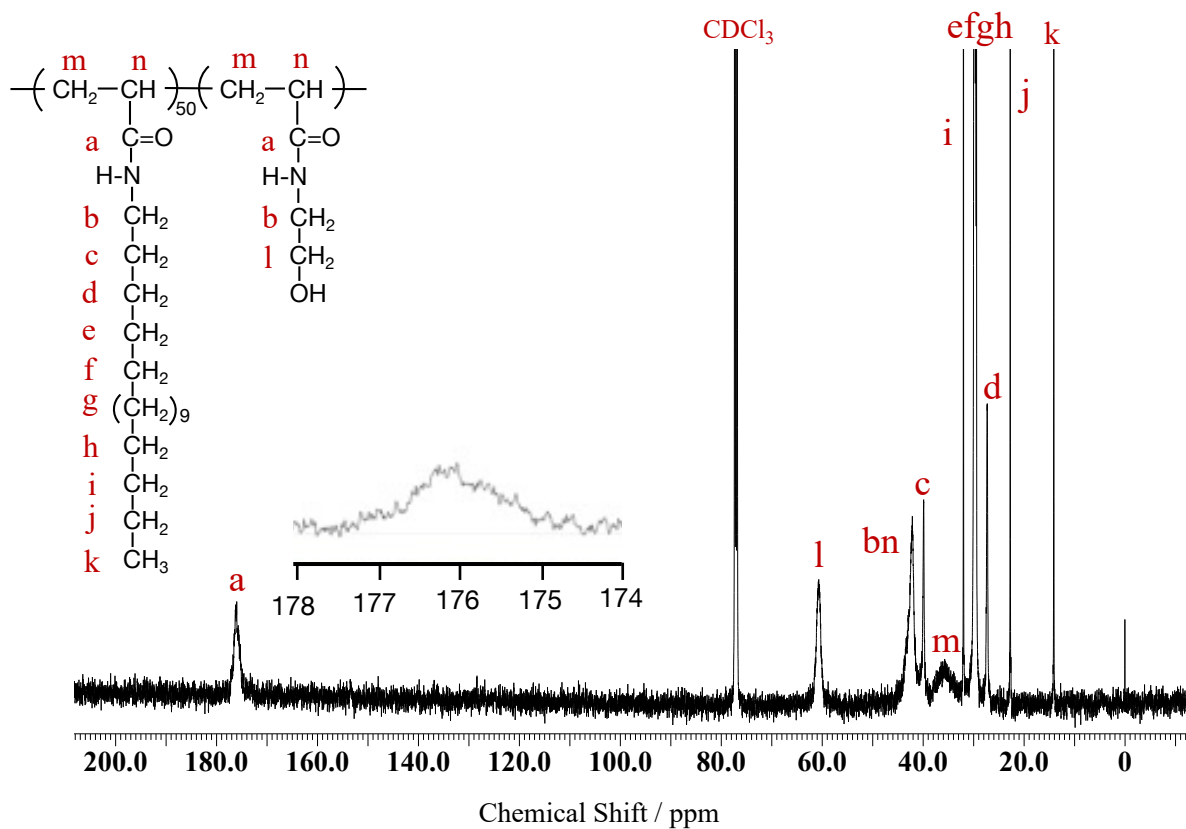

(b)

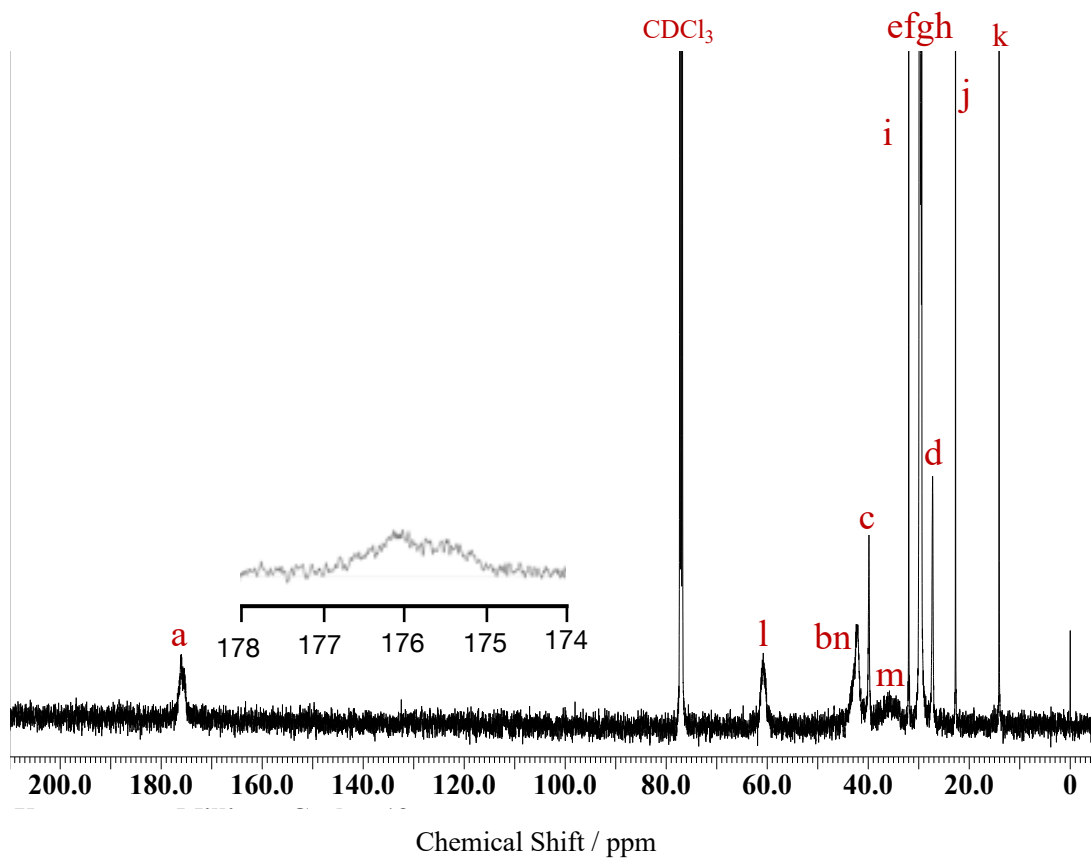

(c)

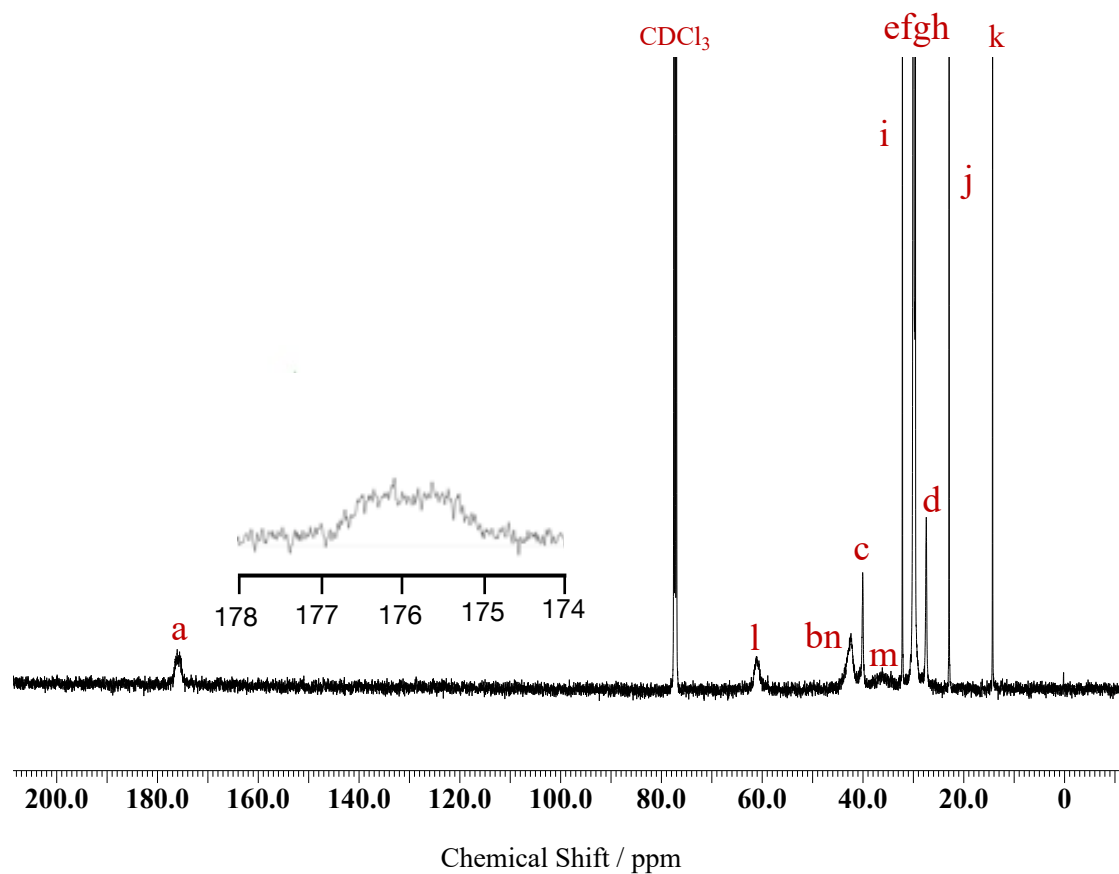

(d)

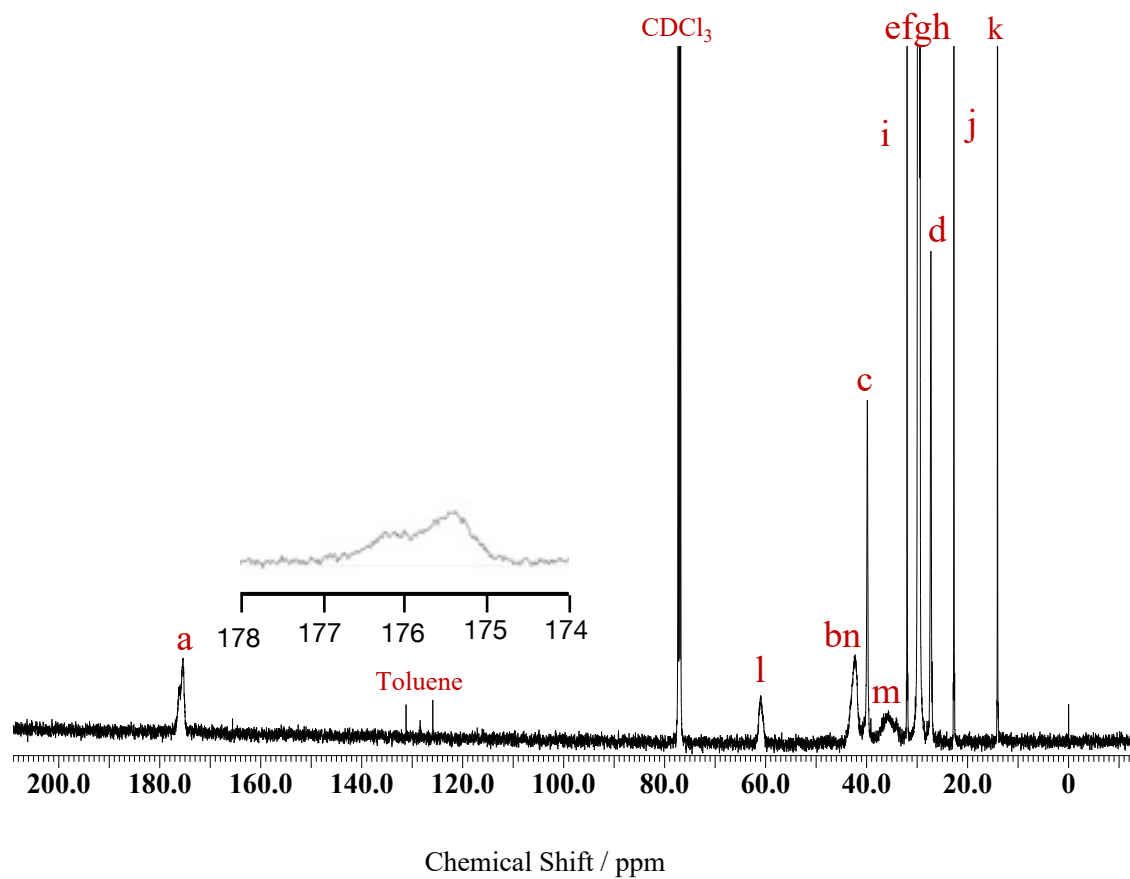

(e)

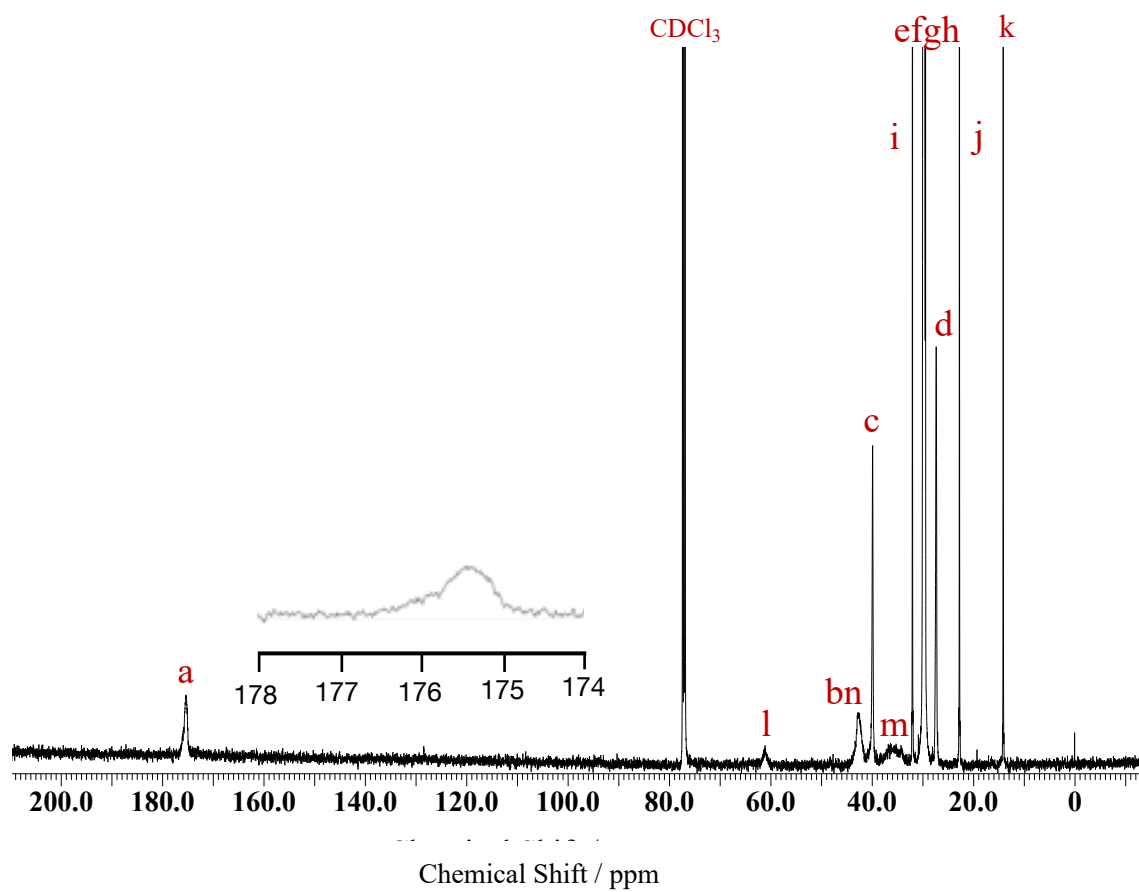

**Figure S3**  $^{13}\text{C}$ -NMR spectrum for p(ODA/HEAm). (a) p(ODA40/HEAm60),

(b) p(ODA50/HEAm50), (c) p(ODA60/HEAm40), (d) p(ODA70/HEAm30), and

(e) p(ODA90/HEAm10).

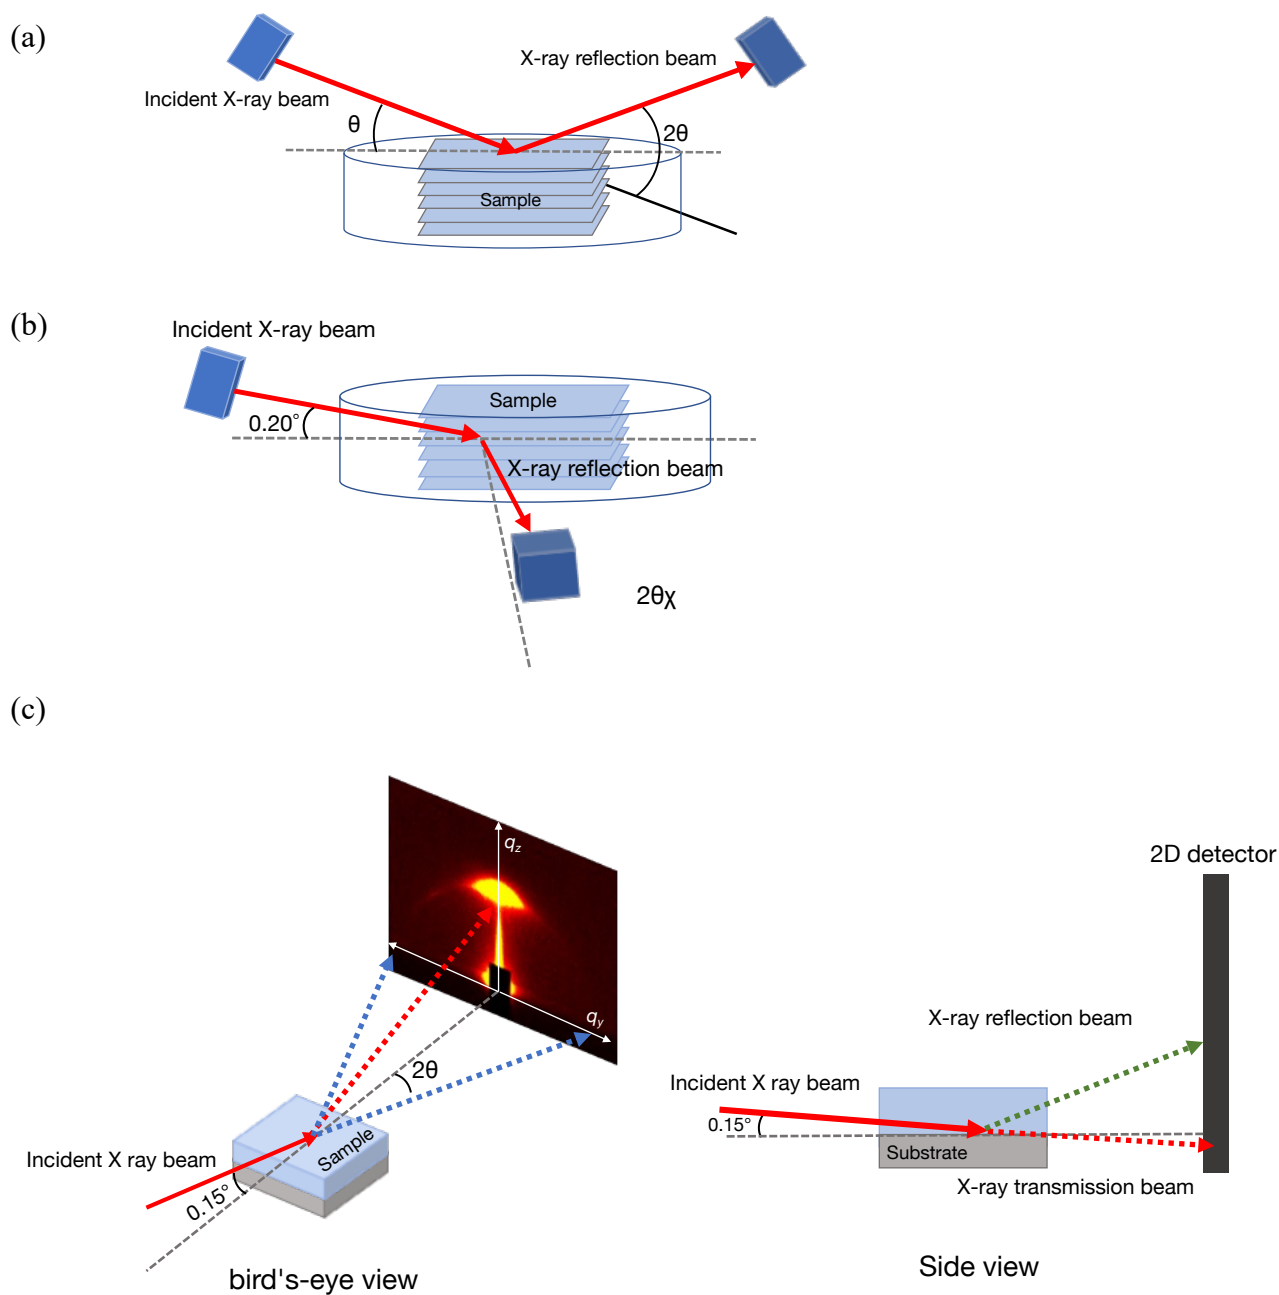

**Figure S4** Experimental geometry for (a) out-of-plane XRD, (b) in-plane XRD and (c) 2D GI-XRD.<sup>2</sup>

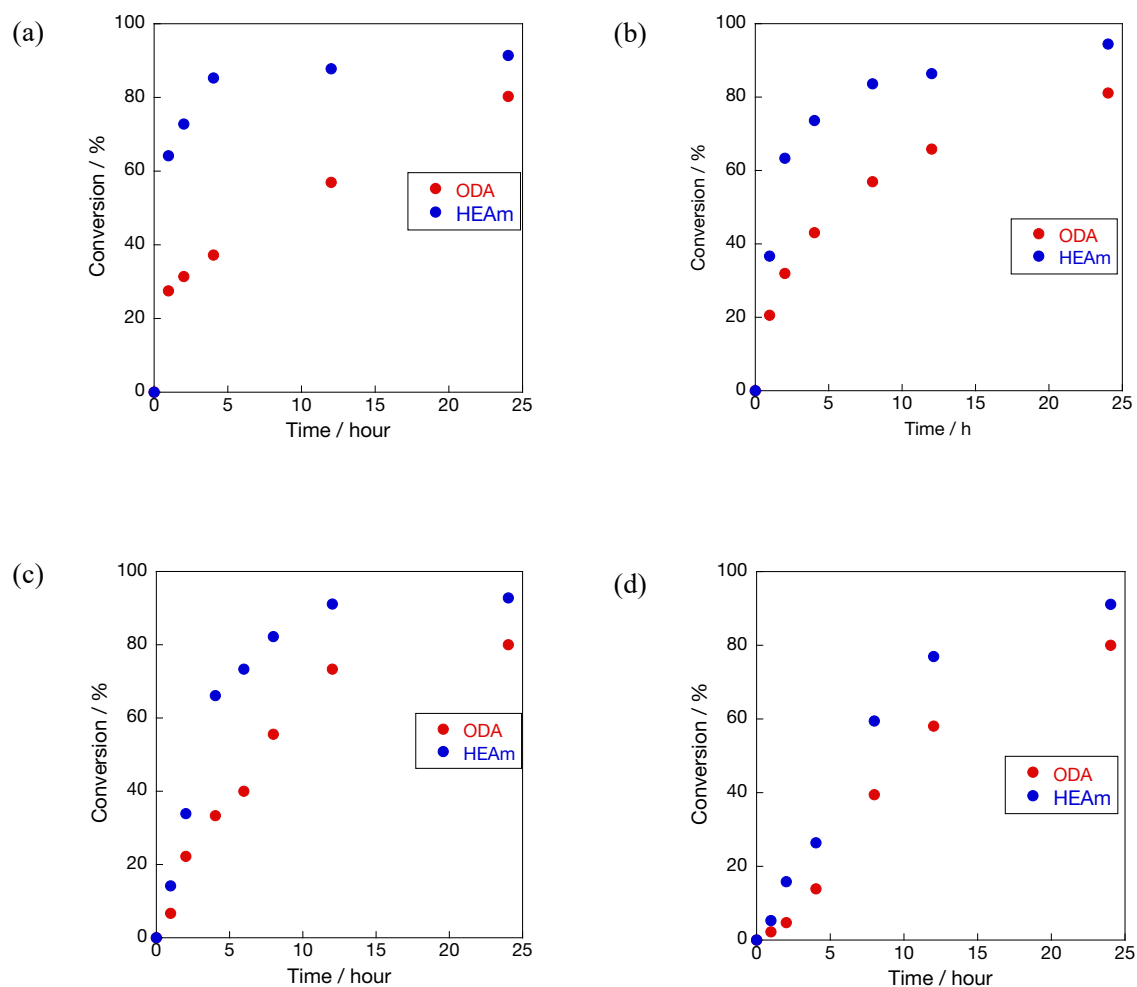

**Figure S5** Time-conversion curves for the free radical copolymerization of ODA and HEAm with the molar feed ratio of ODA : HEAm to (a) 4:6, (b) 5:5, (c) 6:4, and (d) 7:3.

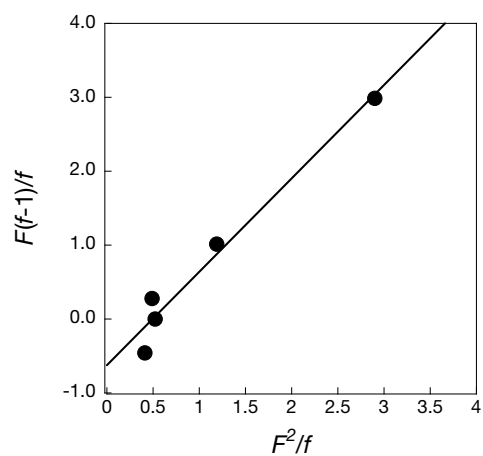

**Figure S6** Fineman-Ross plot for HEAm : ODA copolymerization. The straight line indicates linear fit with correlation coefficient  $R^2 = 0.968$

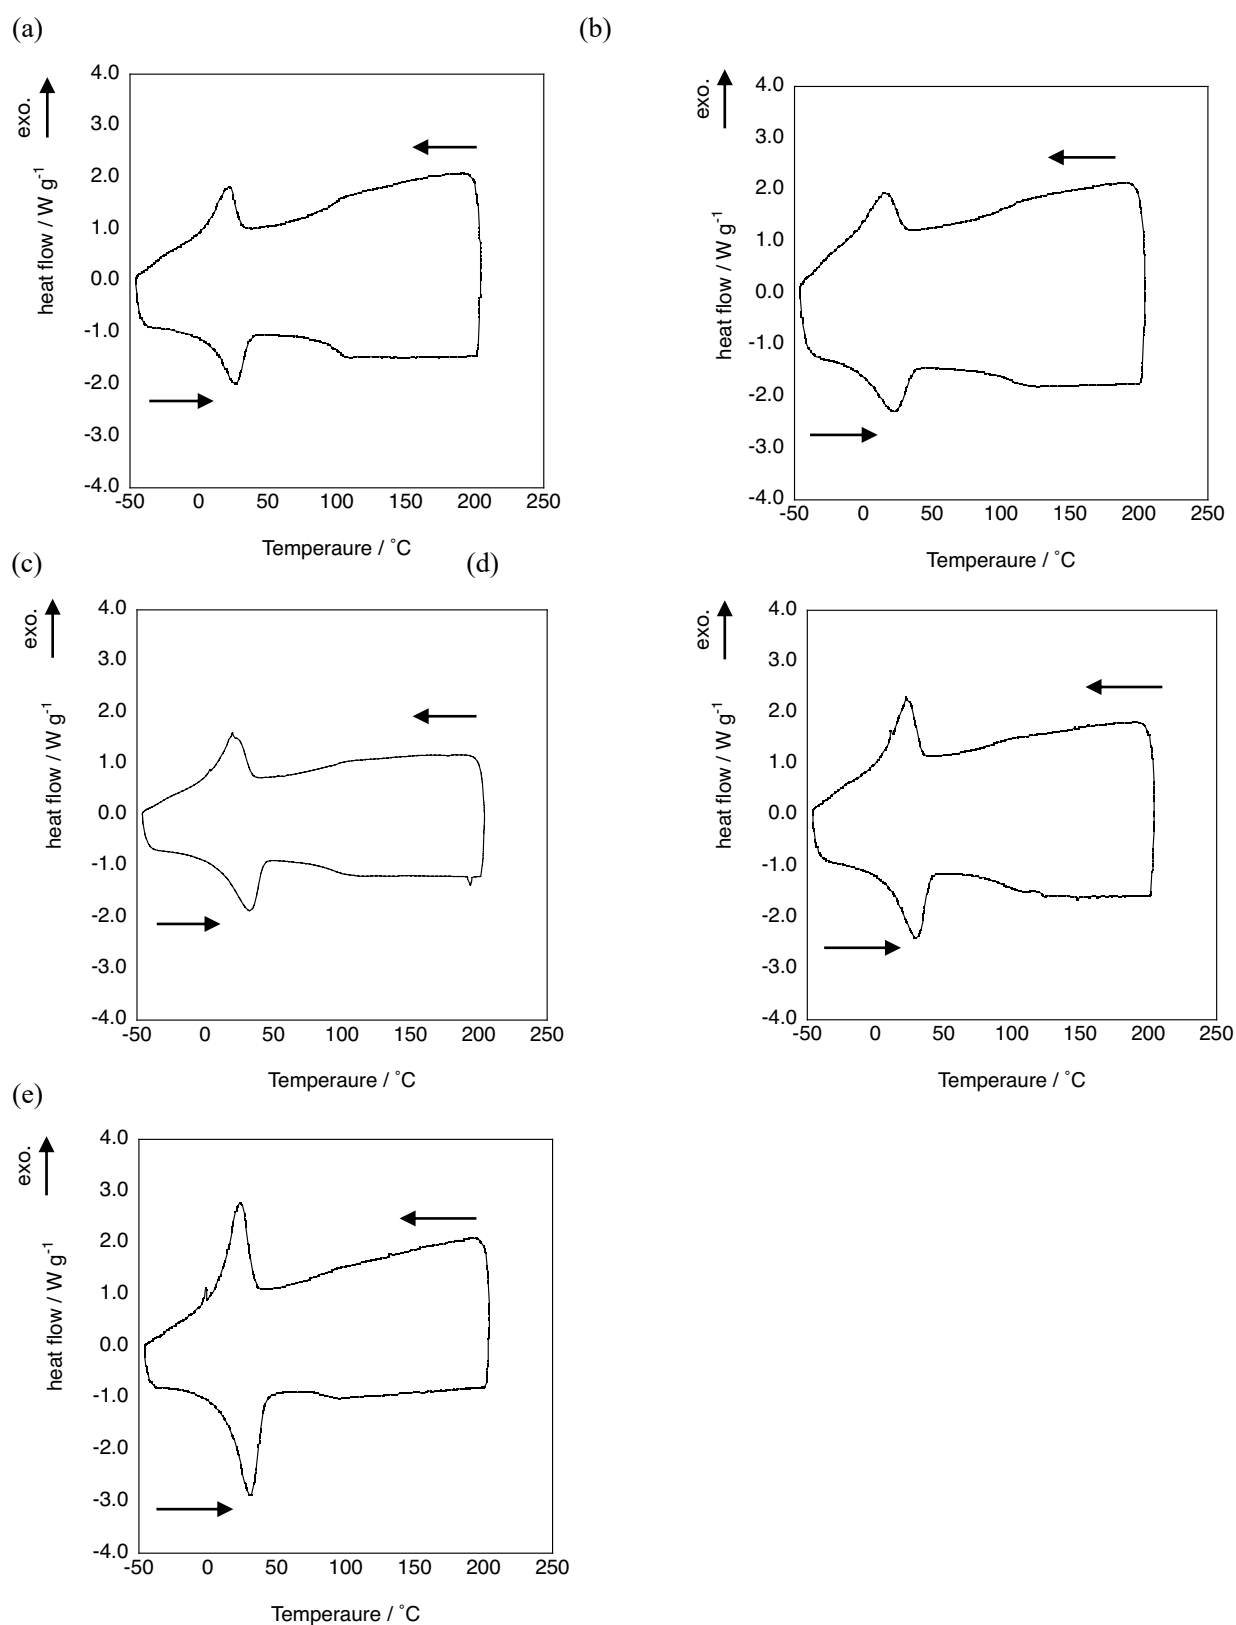

**Figure S7** DSC curve for the third heating and cooling curve for (a) p(ODA40/HEAm60), (b) p(ODA50/HEAm50), (c) p(ODA60/HEAm40), (d) p(ODA70/HEAm30), and (e) p(ODA90/HEAm10).

(a)

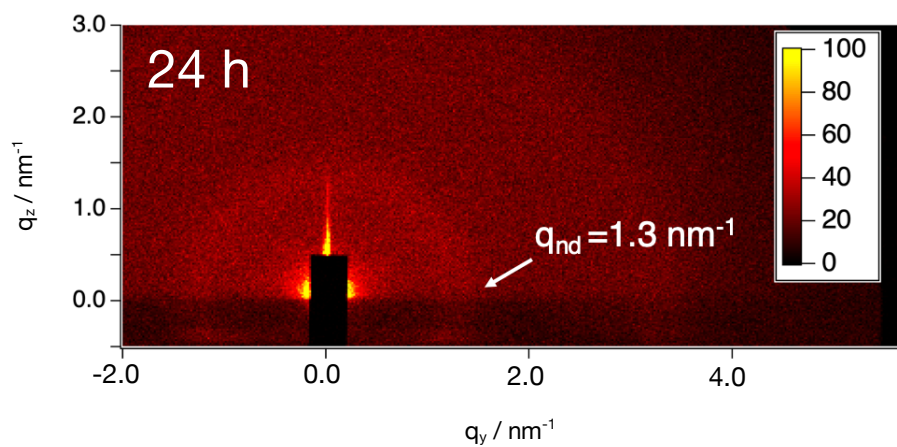

(b)

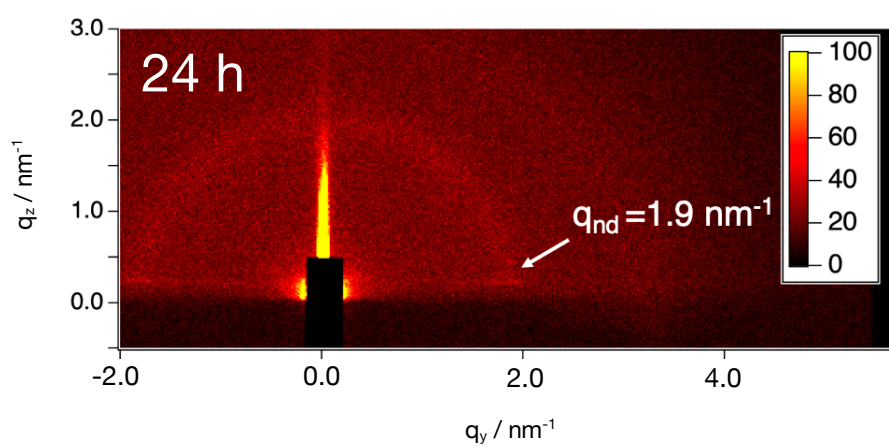

**Figure S8** 2D-XRD image for (a) p(ODA40/HEAm60) and (b) p(ODA90/HEAm10). All the films were thermally annealed for 24 h.

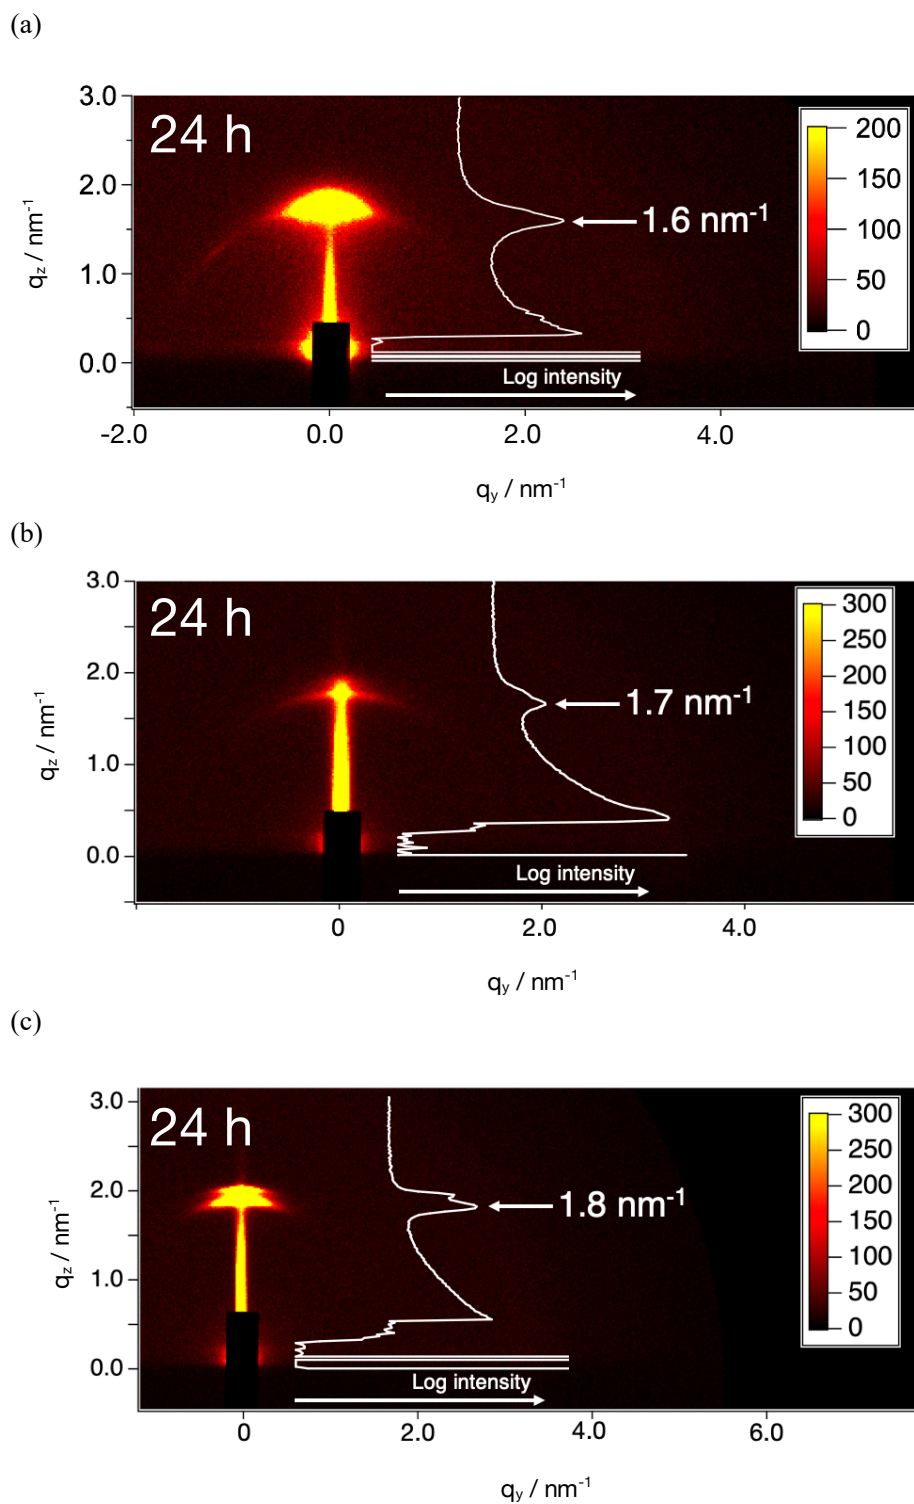

**Figure S9** 2D-XRD image and 1D intensity profile for out of plane for (a) p(ODA50/HEAm50), (b)

p(ODA60/HEAm40), (c) p(ODA70/HEAm30). All the films were thermally annealed at  $\sim T_g + 10^\circ\text{C}$  for 24 h.

The 1D intensity profiles were extracted from the 2D images. The side peak appeared in  $q$  higher than the Bragg peak is originated from a diffraction from the reflected X-ray beam.<sup>2</sup>

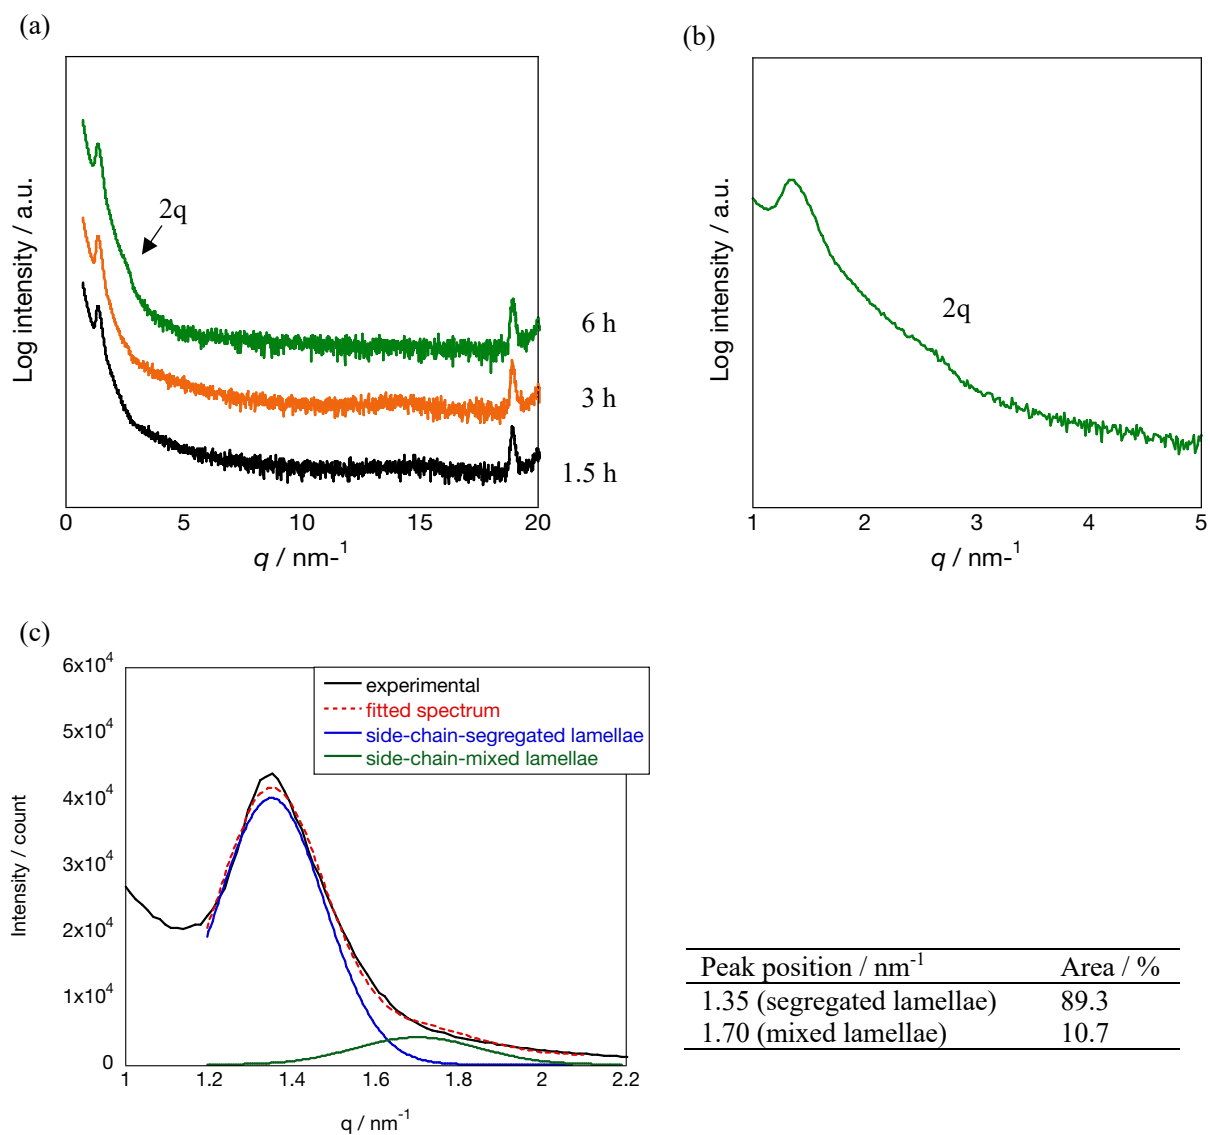

**Figure S10** (a) XRD patterns of p(ODA50/HEAm50) annealed at 160 °C at different times. (b) Expand graph of XRD pattern for 6 h annealed film. (c) Deconvolution of first-order Bragg peak in figure (b). Right table is the fitting results.

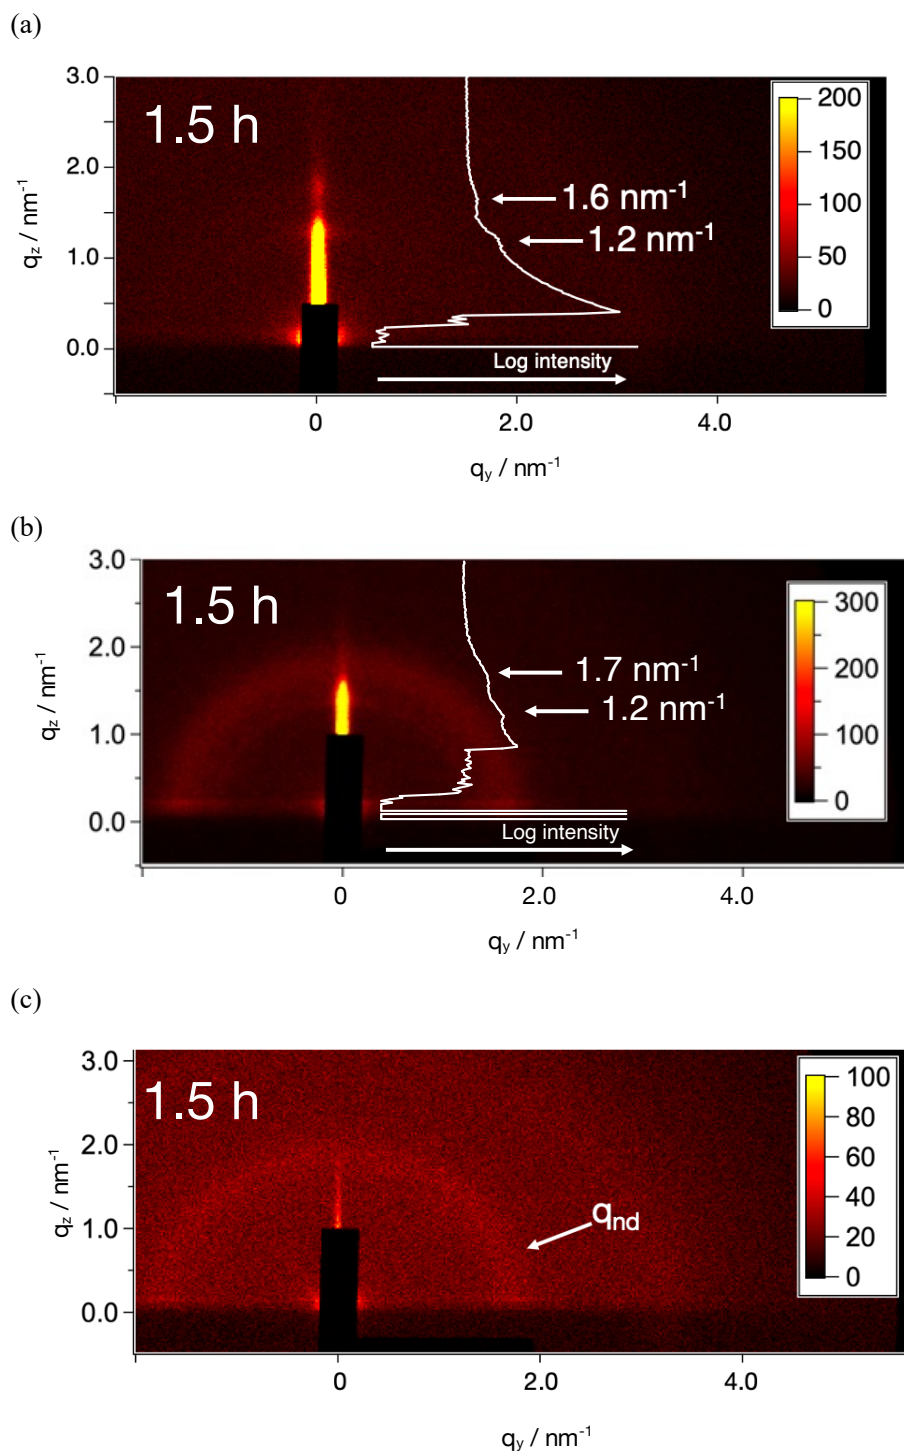

**Figure S11** 2D-XRD image (right) and 1D intensity profile for out of plane (left) for (a) p(ODA50/HEAm50), (b) p(ODA60/HEAm40), (c) p(ODA70/HEAm30). All the films were thermally annealed at 160 °C for 1.5 h. The 1D intensity profiles were extracted from the 2D images. The higher  $q$  value peak in p(ODA50/HEAm50) ( $q = 1.6 \text{ nm}^{-1}$ ) and p(ODA60/HEAm40) ( $q = 1.7 \text{ nm}^{-1}$ ) is attributed to remaining monolayer lamellar structure.

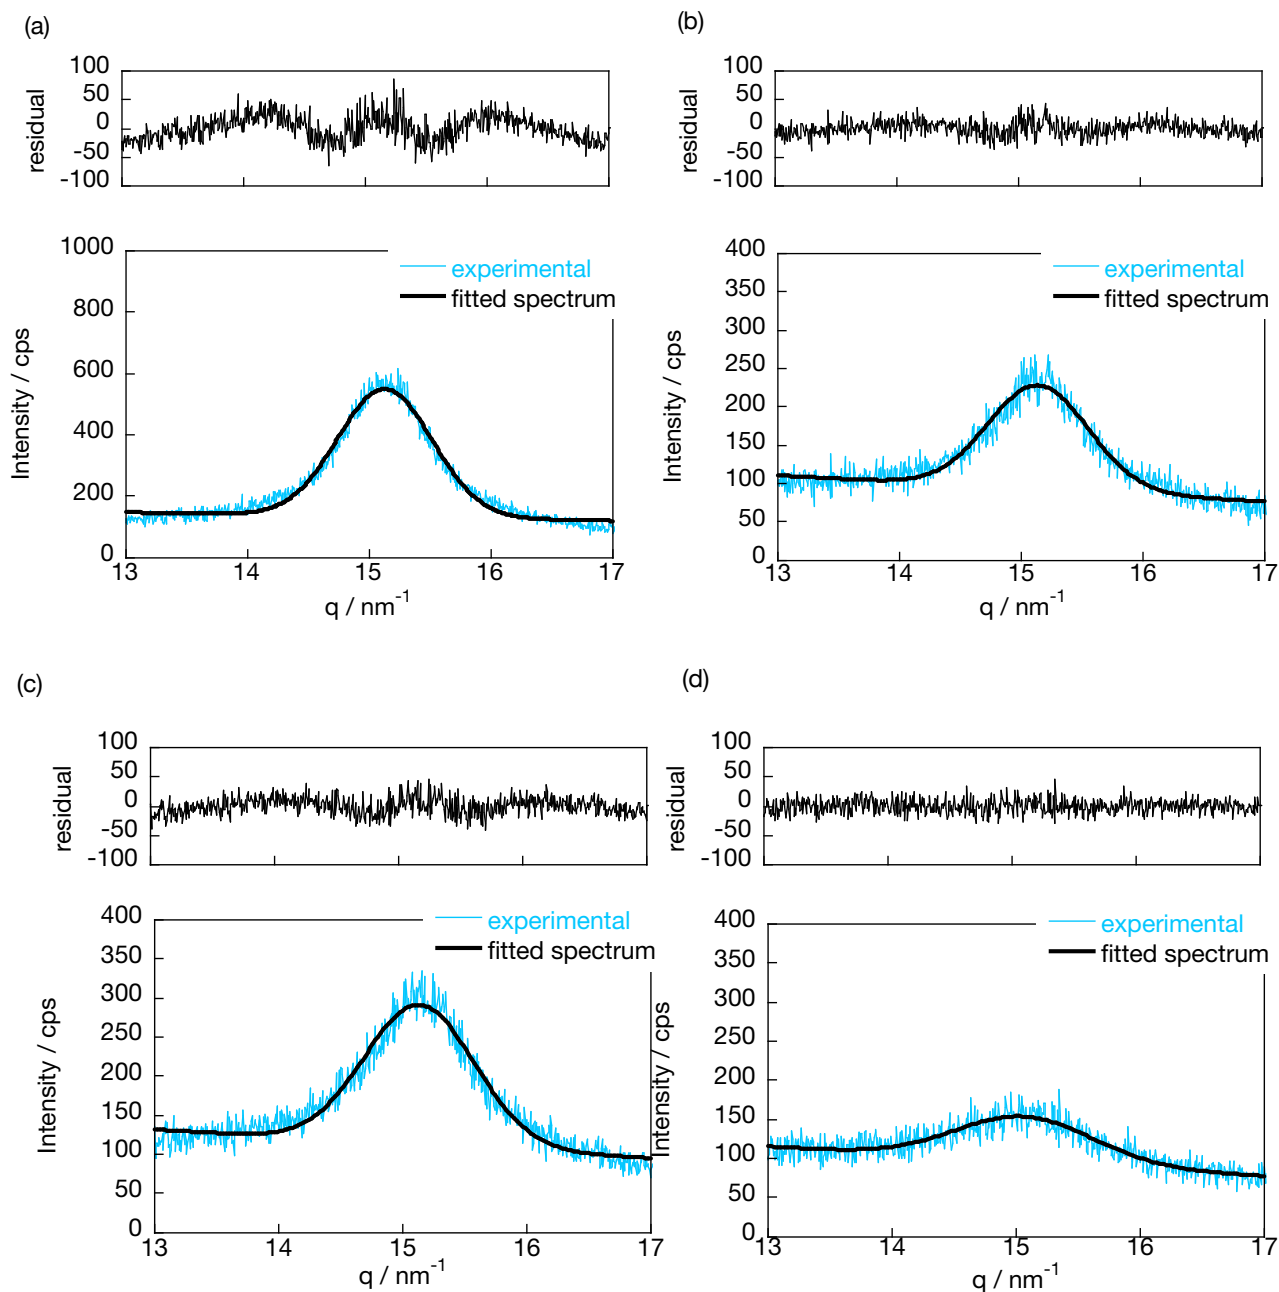

**Figure S12** Fitting result for  $q_{\text{hex}}$  peak of copolymer lamellar film for (a) p(ODA70/HEAm30), (b) p(ODA60/HEAm40) (c) p(ODA50/HEAm50) annealed at 115 °C for 24 h and (d) p(ODA50/HEAm50) annealed at 160 °C for 6 h Upper graph in each spectrum is the residual for the fitting results.

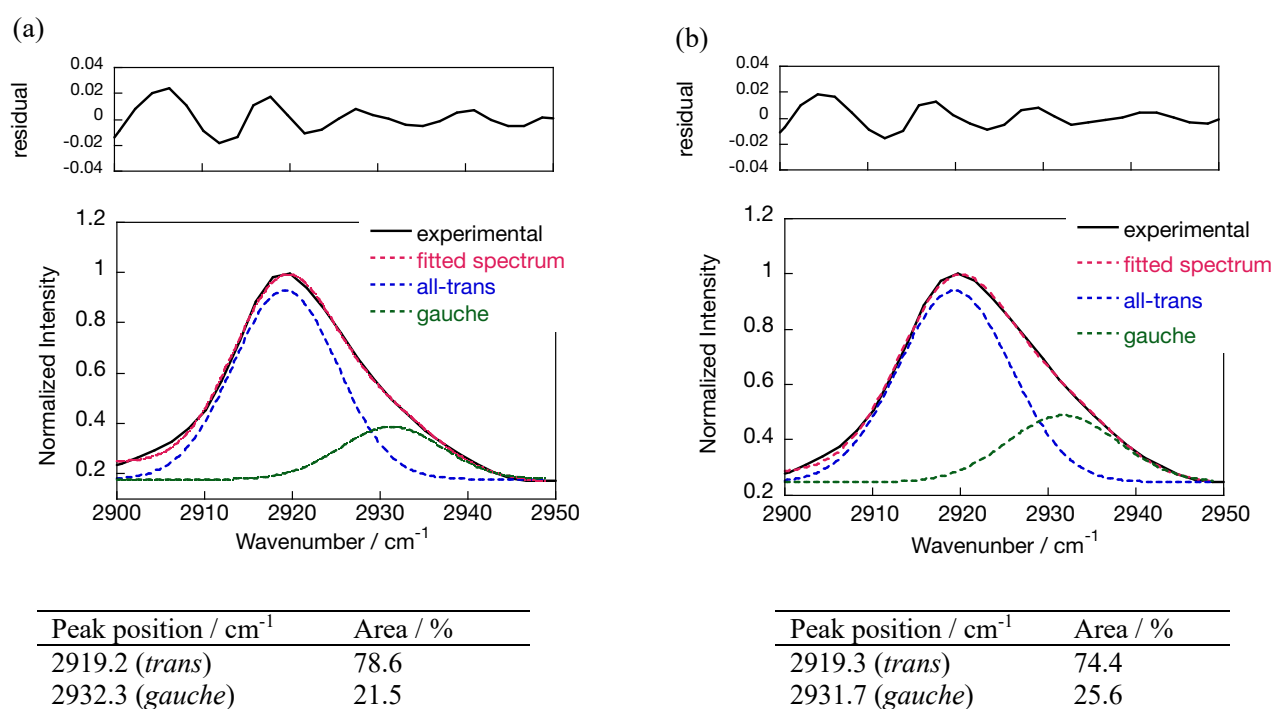

**Figure S13** Deconvolution of  $\text{CH}_2$  asymmetric stretching ( $\nu_a$ ) for p(ODA50/HEAm50) film annealed at (a) 115 °C for 24 h and (b) 160 °C for 6 h Upper graph in each spectrum is the residual for the fitting results and bottom table is the fitting results.

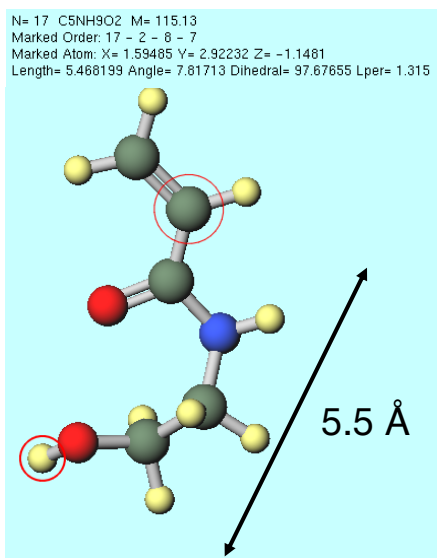

**Figure S14** Length calculation of HEAm side chains. yellow: hydrogen, red: oxygen, green: carbon and blue: nitrogen

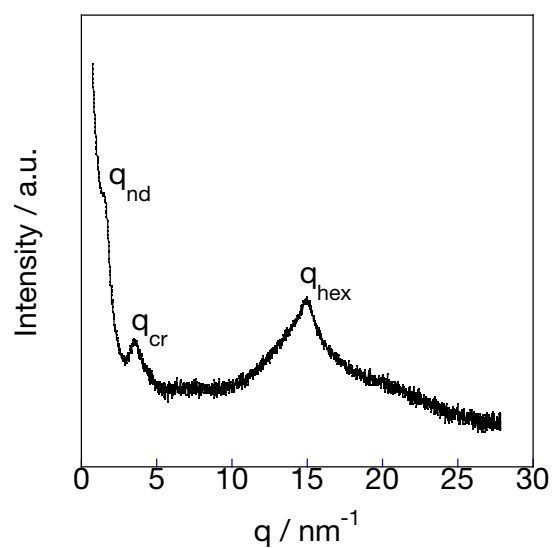

**Figure S15** XRD pattern of p(ODA50/HEAm50) powder annealed at 115 °C for 24h. Strong diffraction at  $q = 15 \text{ nm}^{-1}$  is attributed to diffraction from hexagonally packed alkyl side chains.

## Reference

- (1) Young, R. J.; Lovell, P. A. *Introduction to Polymers; Third Edition ed.; Taylor & Francis: Florida, 2011.*
- (2) Lee, B.; Park, I.; Yoon, J.; Park, S.; Kim, J.; Kim, K. W.; Chang, T.; Ree, M. Structural analysis of block copolymer thin films with grazing incidence small-angle X-ray scattering. *Macromolecules* **2005**, *38*, 4311-4323.
